# Supplementary material for: Climate smart agriculture: assessing needs and perceptions of California's farmers
Source: Frontiers journal article supplement (doi:10.3389/fsufs.2024.1395547), 2024-06-14
Supplement: Data_Sheet_1.PDF [file Data_Sheet_1.PDF]

## Climate Smart Agriculture: Assessing Needs and Perceptions of California's Farmers

**Table 1** *Implementation, Interest and Need for Information by Farmers on Adaptation Practices*

| Adaptation Practices                      | Interest (%) |      |            |              | Need for Information (%) |      |      |      |
|-------------------------------------------|--------------|------|------------|--------------|--------------------------|------|------|------|
|                                           | <i>n</i>     | No   | Interested | Implementing | <i>n</i>                 | No   | Some | High |
| Change irrigation practices               | 315          | 18.4 | 27.6       | 54.0         | 305                      | 42.3 | 41.0 | 16.7 |
| Reduce reliance on groundwater            | 313          | 29.1 | 38.3       | 32.6         | 304                      | 41.4 | 44.1 | 14.5 |
| Water harvesting                          | 303          | 34.7 | 54.5       | 10.9         | 299                      | 39.1 | 41.5 | 19.4 |
| Concentrate surface water on less acreage | 303          | 51.8 | 34.3       | 13.9         | 299                      | 55.2 | 36.1 | 8.7  |
| Use of drought tolerant varieties         | 307          | 30.3 | 48.5       | 21.2         | 299                      | 49.5 | 37.1 | 13.4 |
| Switch to new crops                       | 305          | 59.3 | 30.2       | 10.5         | 302                      | 60.9 | 28.8 | 10.3 |
| Switch to low-chill varieties             | 300          | 61.7 | 31.7       | 6.7          | 300                      | 67.3 | 27.7 | 5.0  |
| Diversify production                      | 305          | 43.3 | 33.1       | 23.6         | 299                      | 58.2 | 32.4 | 9.4  |
| Plant early maturing varieties            | 305          | 49.8 | 34.8       | 15.4         | 300                      | 60.0 | 33.3 | 6.7  |
| Use of cover crops                        | 308          | 26.9 | 33.8       | 39.3         | 302                      | 47.7 | 37.1 | 15.2 |
| Mulching                                  | 308          | 24.4 | 36.4       | 39.3         | 301                      | 47.5 | 39.9 | 12.6 |
| Rotational or adaptive grazing            | 292          | 70.9 | 17.8       | 11.3         | 298                      | 71.8 | 22.8 | 5.4  |
| Build soil organic matter                 | 303          | 17.8 | 35.3       | 46.9         | 300                      | 38.0 | 42.3 | 19.7 |
| Reduce soil disturbance                   | 303          | 24.4 | 27.7       | 47.9         | 301                      | 51.5 | 36.2 | 12.3 |
| Integrate crops and livestock             | 297          | 66.7 | 21.5       | 11.8         | 298                      | 72.1 | 21.5 | 6.4  |
| Rotating crops or intercropping           | 299          | 59.2 | 19.7       | 21.1         | 298                      | 69.8 | 21.8 | 8.4  |
| Transition to perennial plants            | 297          | 57.6 | 13.8       | 28.6         | 299                      | 75.3 | 20.1 | 4.7  |
| Transition to annual crops                | 297          | 58.9 | 20.9       | 20.2         | 297                      | 73.1 | 21.2 | 5.7  |
| Alter planting schedules                  | 298          | 66.1 | 23.8       | 10.1         | 292                      | 71.2 | 24.3 | 4.5  |
| Increase acreage                          | 296          | 59.8 | 32.8       | 7.4          | 287                      | 71.4 | 24.7 | 3.8  |
| Decrease acreage                          | 296          | 81.4 | 12.5       | 6.1          | 284                      | 84.2 | 14.8 | 1.1  |
| Increase ecosystem services               | 298          | 53.4 | 32.9       | 13.8         | 287                      | 58.2 | 35.5 | 6.3  |
| Agroforestry                              | 291          | 69.1 | 23.4       | 7.6          | 287                      | 70.0 | 24.7 | 5.2  |
| Add windbreaks                            | 294          | 66.7 | 23.8       | 9.5          | 285                      | 69.5 | 25.3 | 5.3  |

|                                              |     |      |      |      |     |      |      |      |
|----------------------------------------------|-----|------|------|------|-----|------|------|------|
| Transition to renewable energy for farm use  | 300 | 21.7 | 48.7 | 29.7 | 285 | 37.2 | 42.5 | 20.4 |
| Reduce dependency on fossil fuels            | 293 | 41.3 | 48.1 | 10.6 | 286 | 45.8 | 38.5 | 15.7 |
| Fuel load management (e.g., prescribed fire) | 290 | 68.3 | 23.4 | 8.3  | 281 | 70.5 | 21.0 | 8.5  |
| Alter labor schedules to cope with heat      | 296 | 34.1 | 34.1 | 31.8 | 285 | 58.6 | 31.9 | 9.5  |
| Add on-farm enterprise                       | 288 | 55.9 | 34.0 | 10.1 | 280 | 60.4 | 30.0 | 9.6  |
| Earn off -farm income                        | 292 | 47.6 | 32.9 | 19.5 | 283 | 57.2 | 29.3 | 13.4 |
| Secure access to insurance                   | 291 | 29.2 | 45.7 | 25.1 | 282 | 44.3 | 34.0 | 21.6 |
| Apply for government assistance              | 288 | 33.0 | 45.8 | 21.2 | 282 | 39.0 | 40.4 | 20.6 |
| Change market strategy                       | 287 | 41.8 | 42.9 | 15.3 | 279 | 50.9 | 36.2 | 12.9 |
| Reduce input use                             | 286 | 34.6 | 45.5 | 19.9 | 282 | 46.5 | 41.8 | 11.7 |

**Table 2** *Barriers to Implementation of Adaptation Practices and Program by Farmers*

| Barrier to implementing climate adaptation practices?                                      | n   | Extent of a Barrier (%) |          |          |             |
|--------------------------------------------------------------------------------------------|-----|-------------------------|----------|----------|-------------|
|                                                                                            |     | Not                     | Somewhat | Moderate | Significant |
| Knowledge on suitable adaptation practices                                                 | 290 | 33.1                    | 37.2     | 21.7     | 7.9         |
| Knowledge to implement climate adaptation practices                                        | 284 | 32.4                    | 36.3     | 21.1     | 10.2        |
| Knowledge on how to use climate information for agricultural decisions                     | 282 | 34.4                    | 35.1     | 23.0     | 7.4         |
| Knowledge of new crops                                                                     | 284 | 43.0                    | 27.1     | 20.8     | 9.2         |
| Access to appropriate equipment to implement climate adaptation practices                  | 284 | 28.5                    | 29.2     | 24.6     | 17.6        |
| Access to locally adapted monitoring tools (e.g., weather stations)                        | 282 | 42.9                    | 27.0     | 20.6     | 9.6         |
| Access to locally adapted decision support tools (e.g., prediction tools for temperature). | 284 | 39.8                    | 31.3     | 19.4     | 9.4         |

|                                                                       |     |      |      |      |      |
|-----------------------------------------------------------------------|-----|------|------|------|------|
| Access to climate adapted varieties                                   | 282 | 41.1 | 31.6 | 17.7 | 9.6  |
| Access to water                                                       | 284 | 22.5 | 25.7 | 18.3 | 33.5 |
| Labor access or cost                                                  | 284 | 17.3 | 21.1 | 26.4 | 35.2 |
| Access to lease land                                                  | 282 | 60.3 | 16.3 | 12.4 | 11.0 |
| Land ownership                                                        | 281 | 53.0 | 14.2 | 13.9 | 18.9 |
| High input costs (agrochemicals)                                      | 288 | 10.4 | 18.1 | 24.7 | 46.9 |
| Access to investment capital or funds                                 | 287 | 15.0 | 28.6 | 24.0 | 32.4 |
| Access to appropriate insurance                                       | 279 | 28.7 | 28.0 | 19.7 | 23.7 |
| Government regulations                                                | 288 | 9.7  | 16.3 | 20.8 | 53.1 |
| Access to appropriate markets                                         | 286 | 26.2 | 26.6 | 24.8 | 22.4 |
| Access to detailed economic information (cost/benefit analysis)       | 286 | 24.5 | 36.4 | 23.8 | 15.4 |
| Time                                                                  | 285 | 17.5 | 23.5 | 29.5 | 29.5 |
| Risk of implementing new practices                                    | 286 | 16.4 | 30.8 | 28.8 | 24.8 |
| Access to translation support assistance                              | 279 | 52.3 | 24.0 | 14.7 | 9.0  |
| I am hesitant to implement new practices technologies                 | 282 | 47.9 | 31.6 | 11.3 | 9.2  |
| I have not observed how the adaptation practices work on another farm | 279 | 36.9 | 28.0 | 21.9 | 13.3 |

---
